# Supplementary material
Source: MDPI journal article supplement (https://www.mdpi.com/2073-4344/10/9/1087)
Supplement: s1 [file s1]

## Supplementary Material:

# Precise Catalyst Production for Carbon Nanotube Synthesis with Targeted Structure Enrichment

Xiao Zhang, Ying Deng, Brian Graves, Michael De Volder and Adam Boies \*

Department of Engineering, University of Cambridge, Cambridge, CB2 1PZ, UK.

\* Correspondence: a.boies@eng.cam.ac.uk; Tel.: +44 (0) 1223 746 972.

### S1 Method details – the identification of crystal structure for W-Co alloyed nanoparticles

Because the alloyed nanoparticles (NPs) are deposited onto the window area of a  $\text{Si}_3\text{N}_4$  TEM grid for HRTEM characterization, so that NPs can be annealed in  $\text{H}_2$  environment at  $\sim 400^\circ\text{C}$  (The other grids like carbon film cannot survive the annealing environment), inevitably, there is tens of nanometer of  $\text{Si}_3\text{N}_4$  layer under every NP. SAED signal of NPs is seriously submerged in the noise of  $\text{Si}_3\text{N}_4$  layer. On the other hand, our current electrospray method is good at forming NPs with controlled chemistry. However, the number of NPs produced are not sufficient to form a layer of NPs within a reasonable timeframe to guarantee a detectable XRD signal above the noise of the substrate.

To identify the crystal structure, we can find some planar patterns of NPs, so that the interplanar spacings can be summarized along with the atomic ratio from EDX. To identify the crystallinity, crystal interplanar distances, elements, and elemental ratios are the key fingerprints. PDF cards offer the reliable database for all key information, as well as possible candidates.

The elements are constrained to only W and Co without O and N, based on EDX results. Then the possible candidate crystal structures only include  $\text{W}_{0.07}\text{Co}_{0.93}$  (PDF 01-071-7509),  $\text{W}_{0.1}\text{Co}_{0.9}$  (PDF 01-071-7508),  $\text{W}_{0.13}\text{Co}_{0.87}$  (PDF 01-071-7508),  $\text{WCo}_3$  (PDF 2-1298),  $\text{W}_{0.2}\text{Co}_{0.8}$  (PDF 01-071-7506), and  $\text{W}_6\text{Co}_7$ . On the basis of EDX, the atomic ratio of W:Co measured by EDX is  $(42.3 \pm 7.1) : (57.8 \pm 8.3)$ . the only ratio matched is  $\text{W}_6\text{Co}_7$  as single crystal. We suggest the NPs to be single crystal rather than polycrystal or amorphous structure is on the basis of (1) the fringe patterns of mNPs are all across the whole diameter of mNPs rather than part of mNPs, (2) the uniform elements distribution from EDX.

We summarize all the interplanar distances from 8 alloyed mNPs measured from HRTEM (Table 1). All of these distances are measured with FFT process to eliminate the noise disturbance. With comparison, our particles' characteristics are in good agreement with those of  $\text{W}_6\text{Co}_7$  (PDF exp.2-1091) (Table 2).

Table S1. Interplanar spacings statistics of alloyed mNPs measured from HRTEM

| No. of NPs | Diameter of NPs/nm | Interplanar distances/nm |
|------------|--------------------|--------------------------|
| 1          | 6.4                | 0.206, 0.229             |
| 2          | 6.6                | 0.228                    |
| 3          | 3.6                | 0.251                    |
| 4          | 4.1                | 0.206, 0.212             |
| 5a         | 3.6                | 0.216, 0.228             |
| 5b         | 3.8                | 0.196, 0.212, 0.216      |
| 5c         | 3.5                | 0.216                    |
| 5d         | 3.7                | 0.202, 0.216, 0.229      |
| 6          | 4.4                | 0.252                    |
| 7          | 4.3                | 0.216, 0.227             |
| 8          | 3.6                | 0.202, 0.211, 0.229      |

Table S2. Interplanar spacings information of  $W_6Co_7$  (PDF exp.2-1091) in the range of 0.18-0.32 nm

| H | K  | L  | XRD 2Theta/° | Interplanar distance/nm | XRD Intensity |
|---|----|----|--------------|-------------------------|---------------|
| 1 | 0  | -5 | 27.97        | 0.3190                  | 70.4          |
| 1 | -1 | 5  | 27.97        | 0.3190                  | 70.4          |
| 0 | 1  | 5  | 27.97        | 0.3190                  | 70.4          |
| 0 | 0  | 9  | 31.60        | 0.2831                  | 323.9         |
| 0 | 1  | -7 | 32.94        | 0.2719                  | 3.6           |
| 1 | -1 | -7 | 32.94        | 0.2719                  | 3.6           |
| 1 | 0  | 7  | 32.94        | 0.2719                  | 3.6           |
| 1 | -1 | 8  | 35.73        | 0.2513                  | 66.5          |
| 1 | 0  | -8 | 35.73        | 0.2513                  | 66.5          |
| 0 | 1  | 8  | 35.73        | 0.2513                  | 66.5          |
| 2 | -1 | 0  | 38.11        | 0.2362                  | 1000          |
| 1 | -2 | 0  | 38.11        | 0.2362                  | 1000          |
| 1 | 1  | 0  | 38.11        | 0.2362                  | 1000          |
| 1 | 1  | 3  | 39.61        | 0.2275                  | 15.7          |
| 2 | -1 | 3  | 39.61        | 0.2275                  | 15.7          |
| 2 | -1 | -3 | 39.61        | 0.2275                  | 15.7          |
| 1 | -2 | -3 | 39.61        | 0.2275                  | 15.7          |
| 1 | -2 | 3  | 39.61        | 0.2275                  | 15.7          |
| 1 | 1  | -3 | 39.61        | 0.2275                  | 15.7          |

|   |    |    |       |        |       |
|---|----|----|-------|--------|-------|
| 1 | 0  | 10 | 41.77 | 0.2163 | 577.8 |
| 0 | 0  | 12 | 42.58 | 0.2123 | 308   |
| 1 | -2 | 6  | 43.87 | 0.2064 | 284.9 |
| 2 | -1 | -6 | 43.87 | 0.2064 | 284.9 |
| 1 | 1  | -6 | 43.87 | 0.2064 | 284.9 |
| 2 | -1 | 6  | 43.87 | 0.2064 | 284.9 |
| 1 | -2 | -6 | 43.87 | 0.2064 | 284.9 |
| 1 | 1  | 6  | 43.87 | 0.2064 | 284.9 |
| 2 | -2 | 1  | 44.44 | 0.2039 | 200.4 |
| 2 | 0  | -1 | 44.44 | 0.2039 | 200.4 |
| 0 | 2  | 1  | 44.44 | 0.2039 | 200.4 |
| 2 | -2 | -2 | 44.89 | 0.2019 | 25.2  |
| 2 | 0  | 2  | 44.89 | 0.2019 | 25.2  |
| 0 | 2  | -2 | 44.89 | 0.2019 | 25.2  |
| 1 | -1 | 11 | 44.97 | 0.2016 | 269.8 |
| 0 | 1  | 11 | 44.97 | 0.2016 | 269.8 |
| 2 | -2 | 4  | 46.64 | 0.1947 | 79.2  |
| 0 | 2  | 4  | 46.64 | 0.1947 | 79.2  |
| 2 | 0  | -4 | 46.64 | 0.1947 | 79.2  |
| 0 | 2  | -5 | 47.93 | 0.1898 | 94.9  |
| 2 | -2 | -5 | 47.93 | 0.1898 | 94.9  |
| 2 | 0  | 5  | 47.93 | 0.1898 | 94.9  |
| 1 | -2 | 9  | 50.31 | 0.1813 | 33.2  |
| 2 | -1 | -9 | 50.31 | 0.1813 | 33.2  |
| 1 | 1  | -9 | 50.31 | 0.1813 | 33.2  |
| 2 | -1 | 9  | 50.31 | 0.1813 | 33.2  |
| 1 | -2 | -9 | 50.31 | 0.1813 | 33.2  |
| 1 | 1  | 9  | 50.31 | 0.1813 | 33.2  |
